# Supplementary material for: Lipids as integral components in mussel adhesion
Source: Royal Society of Chemistry journal article supplement (doi:10.1039/c8sm00509e), 2018-01-01
Supplement: c8sm00509e1.pdf [file c8sm00509e1.pdf]

## Supplementary Materials

### Lipids as Integral Components in Mussel Adhesion

Yunhong He <sup>a,b</sup>, Chengjun Sun <sup>b,c,\*</sup>, Fenghua Jiang <sup>b</sup>, Bo Yang <sup>d</sup>, Jingxi Li <sup>b</sup>, Chao  
Zhong <sup>e</sup>, Li Zheng <sup>b</sup> and Haibing Ding <sup>a,f,\*</sup>

<sup>a</sup> *Key Laboratory of Marine Chemistry Theory and Technology, Ministry of Education, Ocean University of China, Qingdao, China.*

<sup>b</sup> *Key Laboratory of Marine Bioactive Substances and Analytical Technology, the First Institute of Oceanography, State Oceanic Administration (SOA), Qingdao, China.*

<sup>c</sup> *Laboratory for Marine Drugs and Bioproducts, Qingdao National Laboratory for Marine Science and Technology, Qingdao, China.*

<sup>d</sup> *Qingdao No. 2 Middle School, Qingdao, China.*

<sup>e</sup> *School of Physical Science and Technology, Shanghai Tech University, Shanghai, China.*

<sup>f</sup> *Laboratory for Marine Ecology and Environmental Science, Qingdao National Laboratory of Marine Science and Technology, Qingdao, China.*

\* Corresponding authors:

E-mail address: csun@fio.org.cn (C. Sun); dinghb@ouc.edu.cn (H. Ding).

Tel.: +86-532-88963310; Fax: +86-532-88963253.

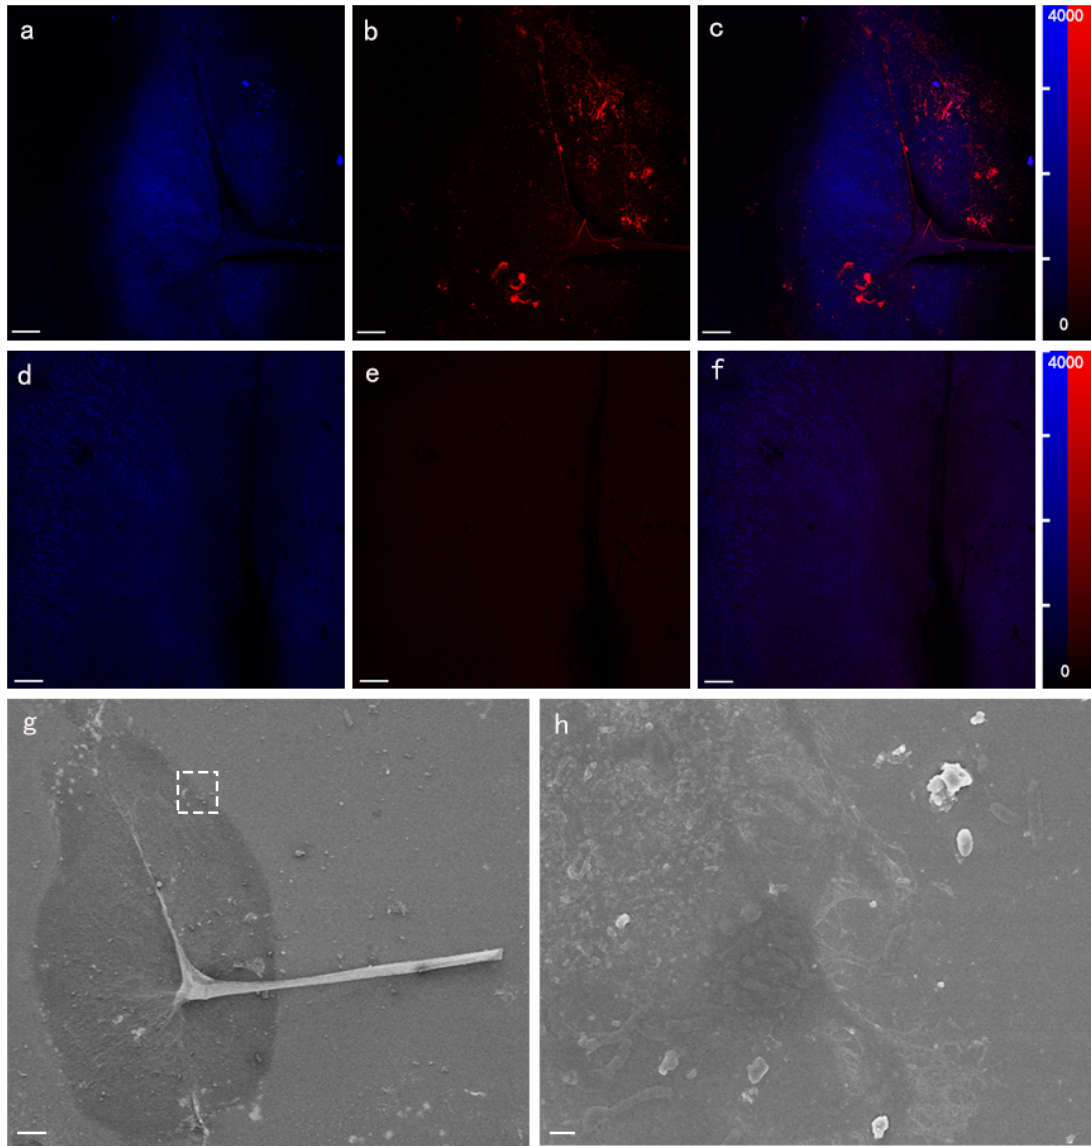

**Fig. S1.** Hoechst and FM1-43FX staining and SEM imaging of a plaque. a: Hoechst staining; b: FM1-43FX staining; c: overlaying of Hoechst and FM1-43FX staining; d: e, f: control. Scale bar: 100  $\mu\text{m}$ ; g: SEM imaging of a plaque, scale bar: 100  $\mu\text{m}$ ; h: SEM image of a plaque, scale bar: 1  $\mu\text{m}$ .

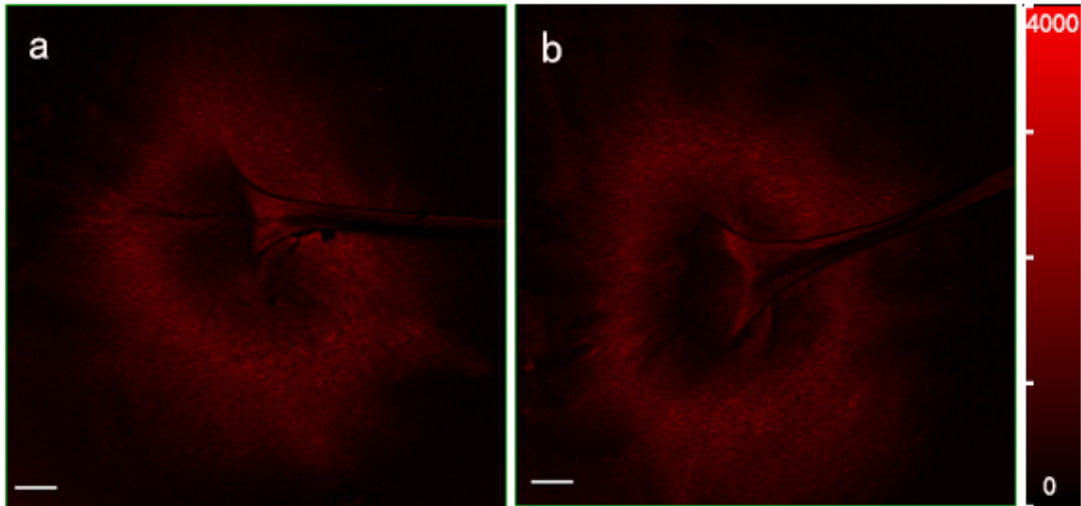

**Fig. S2.** CLSM images of ORO staining of plaque. a: plaque; b: control. Scale bar: 100  $\mu\text{m}$ .

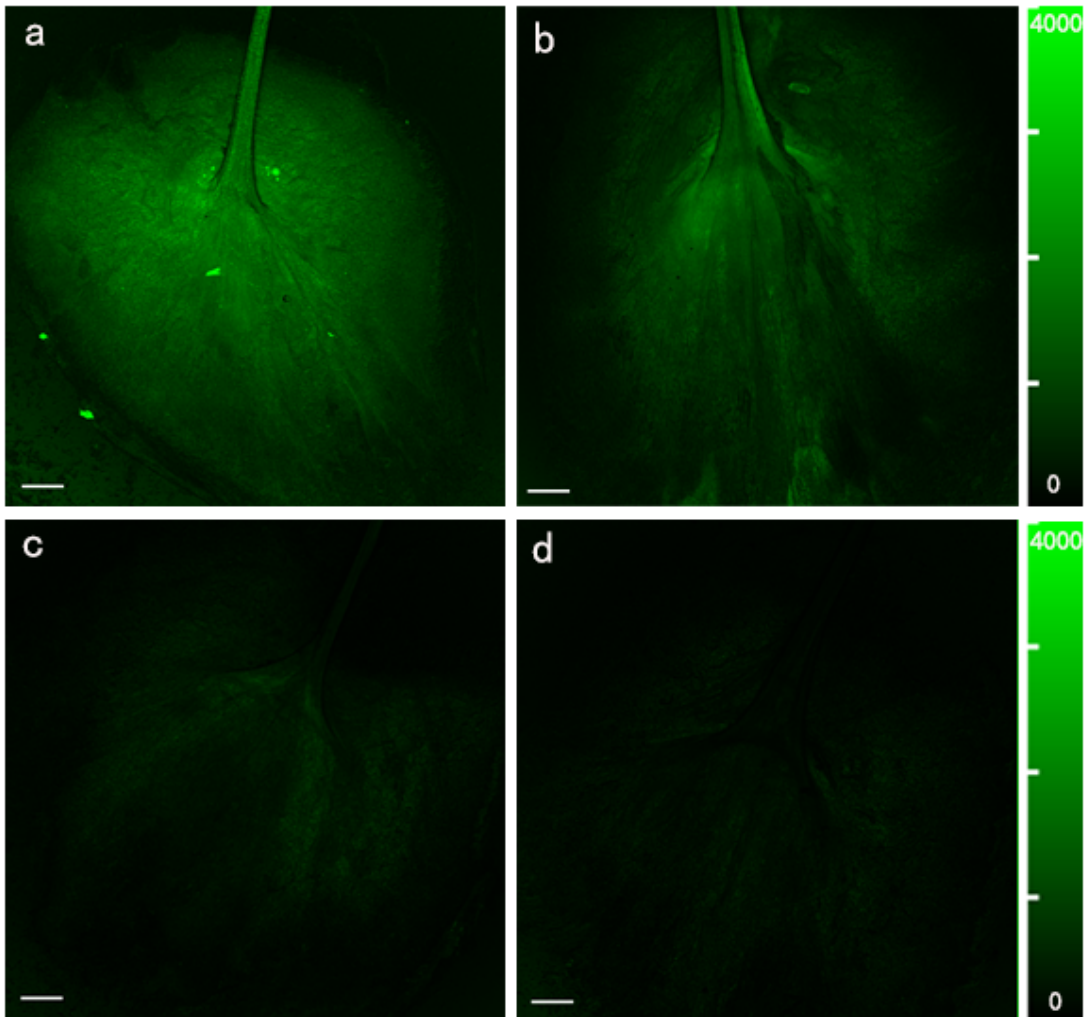

**Fig. S3.** CLSM images of Fluoresceinamine staining of a byssal thread. a: fresh thread; b: one-week-old thread; c, d: control. Scale bar: 10  $\mu\text{m}$ .

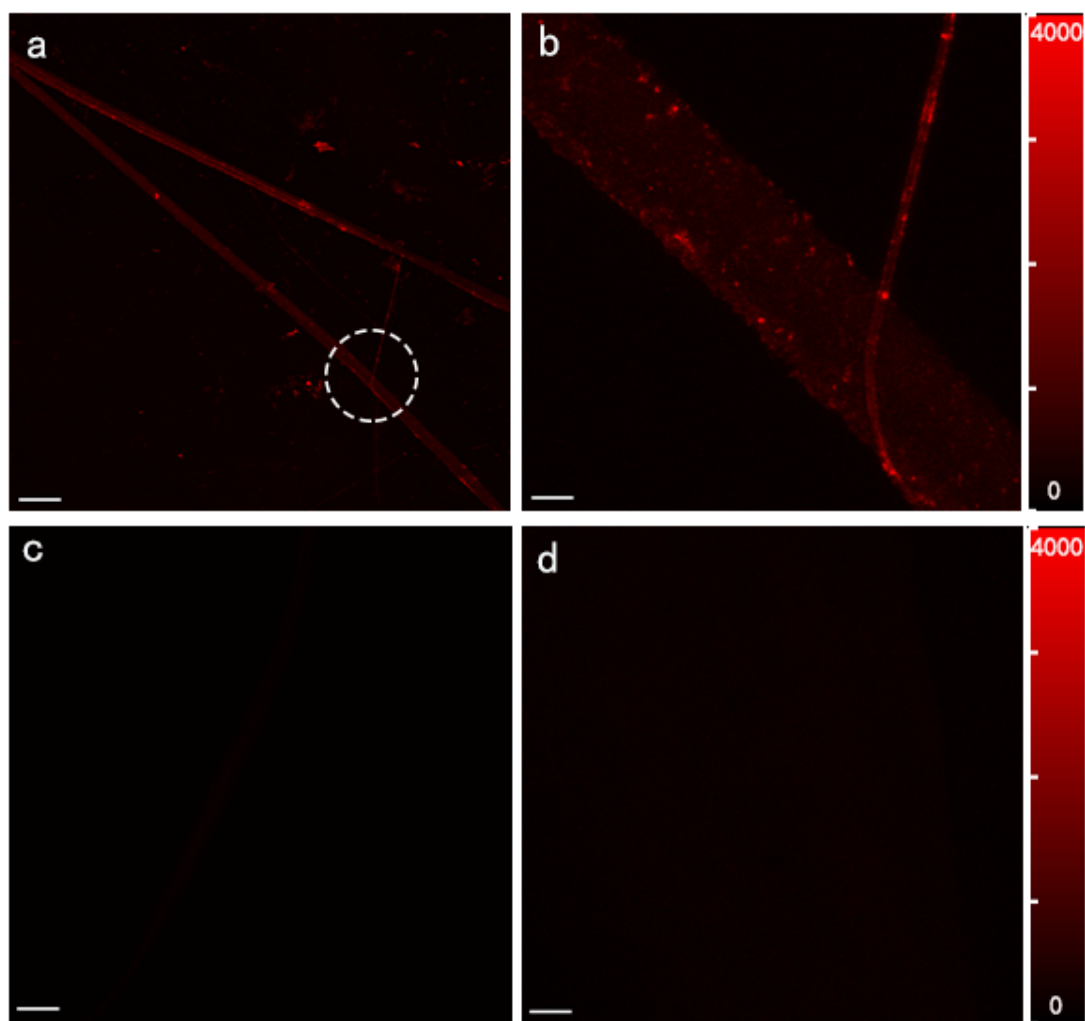

**Fig. S4.** CLSM images of FM1-43FX staining of a normal byssal thread. a, c: scale bar 100  $\mu\text{m}$ ; b, d: scale bar 10  $\mu\text{m}$ ; a, b: FM1-43FX staining; c, d: control.

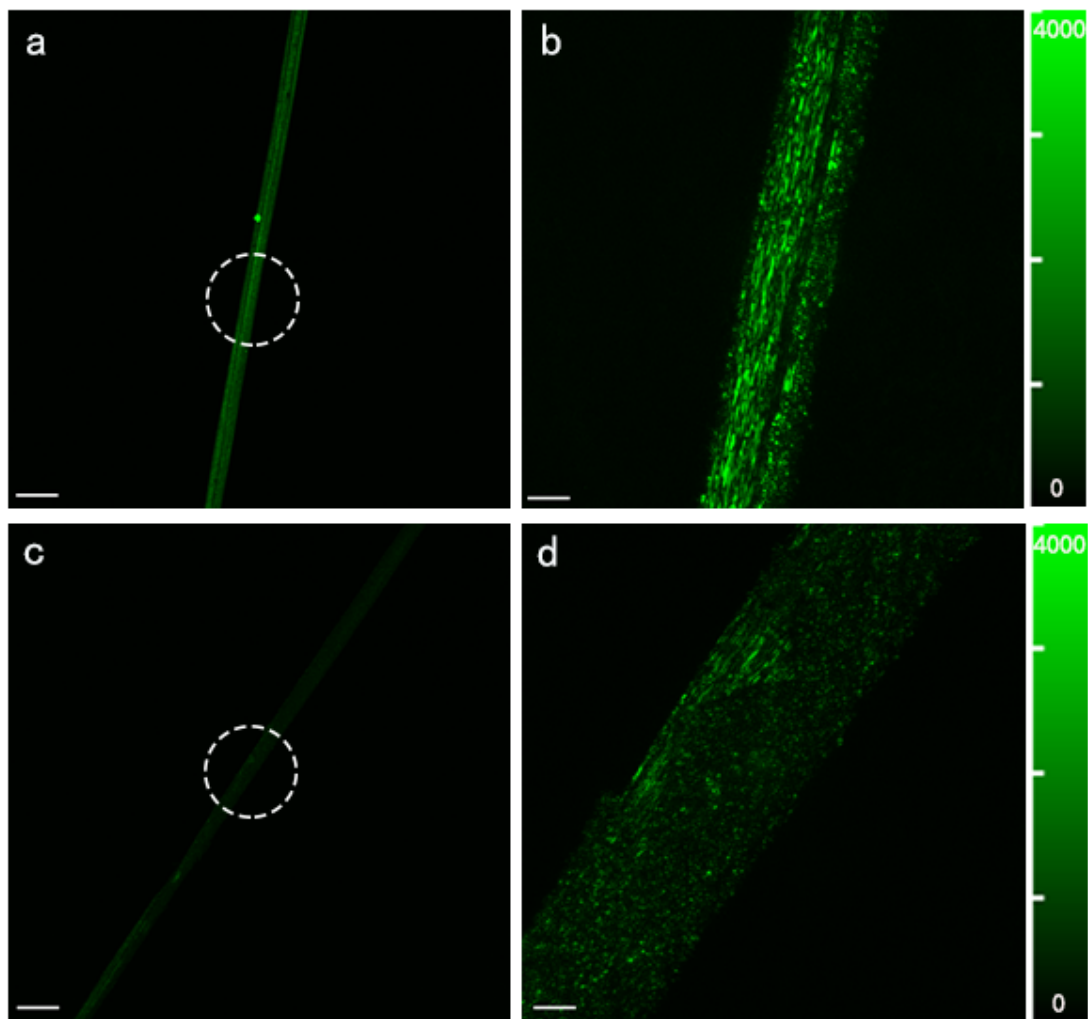

**Fig. S5.** CLSM images of Fluoresceinamine staining of a byssal thread. a, c: scale bar 100  $\mu\text{m}$ ; b, d: scale bar 10  $\mu\text{m}$ ; c, d: control.

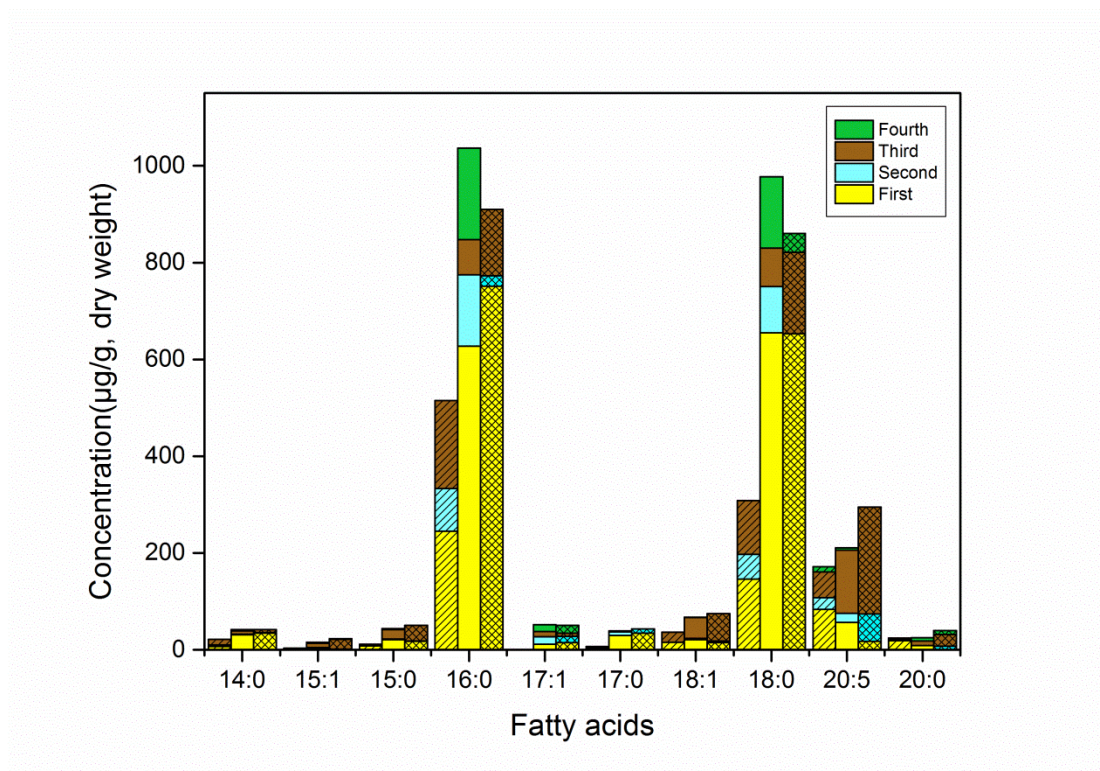

**Fig. S6.** Fatty acids compositions in different kinds of mussels. *Mytilus galloprovincialis* (slash pattern, first in each group); *Mytilus coruscus* (solid pattern, second in each group); *Mytilus californianus* (grid pattern, third in each group).
